# Supplementary material for: Accelerated formation and improved performance of CH3NH3PbI3-based perovskite solar cells via solvent coordination and anti-solvent extraction
Source: Royal Society of Chemistry journal article supplement (doi:10.1039/c6ta10526b), 2017-01-01
Supplement: c6ta10526b1.pdf [file c6ta10526b1.pdf]

## Supplementary Information

### Accelerated formation and improved performance of CH<sub>3</sub>NH<sub>3</sub>PbI<sub>3</sub> based perovskite solar cells via solvent coordination and anti-solvent extraction

Jitao Zhang<sup>a,c</sup>, Guangmei Zhai<sup>\*a,b,c</sup>, Wenhui Gao<sup>a,c</sup>, Caifeng Zhang<sup>a,c</sup>,  
Zhimeng Shao<sup>a,c</sup>, Fuhong Mei<sup>a,c</sup>, Jianbing Zhang<sup>d</sup>, Yongzhen Yang<sup>a,c</sup>,  
Xuguang Liu<sup>a,c,e</sup>, and Bingshe Xu<sup>a,c</sup>

<sup>a</sup> Key Laboratory of Interface Science and Engineering in Advanced Materials of Ministry of Education, Research Centre of Advanced Materials Science and Technology, Taiyuan University of Technology, Taiyuan, Shanxi 030024, China

<sup>b</sup> State Key Laboratory of Electronic Thin Films and Integrated Devices, University of Electronic Science and Technology of China, Chengdu, Sichuan 610054, China

<sup>c</sup> Collaborative Innovation Center for Advanced Thin-film Optoelectronic Materials and Devices in Shanxi Province, Taiyuan, Shanxi 030024, China

<sup>d</sup> School of Optical and Electronic Information, Huazhong University of Science and Technology, Wuhan, Hubei 430074, China

<sup>e</sup> College of Chemistry and Chemical Engineering, Taiyuan University of Technology, Taiyuan, Shanxi 030024, China

\* [zhai Guangmei@tyut.edu.cn](mailto:zhai Guangmei@tyut.edu.cn)

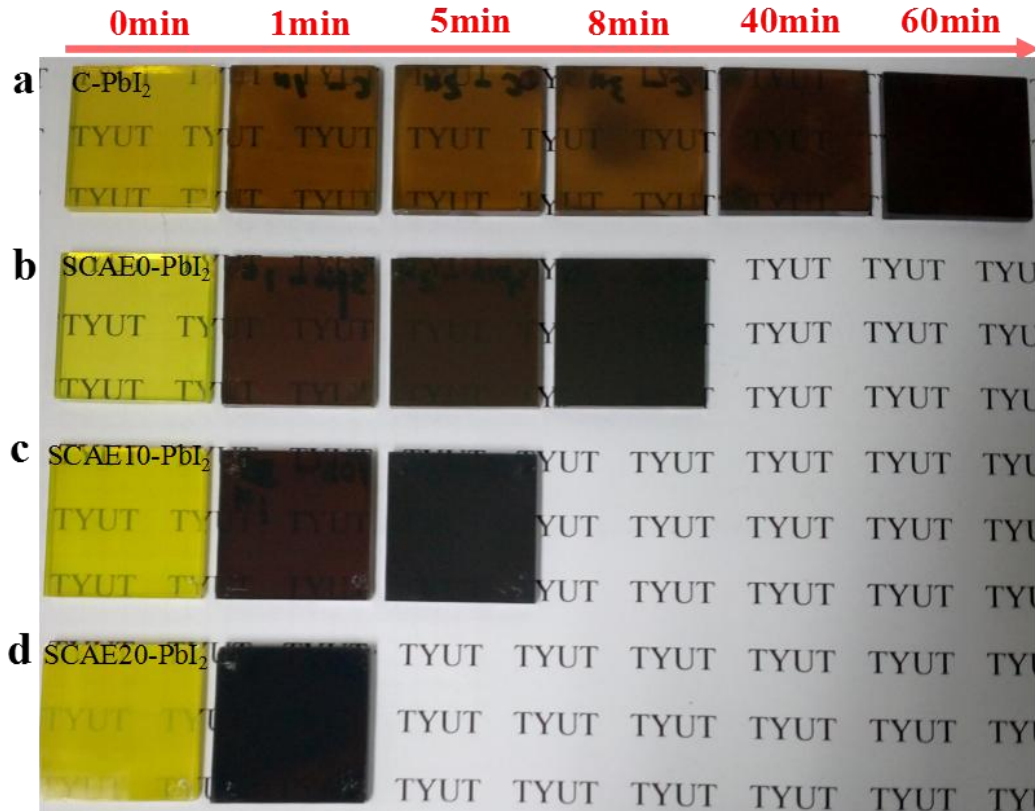

Fig. S1 The photographic images of perovskite samples converted from (a) C-PbI<sub>2</sub>, (b) SCAE0-PbI<sub>2</sub>, (c) SCAE10-PbI<sub>2</sub> and (d) SCAE20-PbI<sub>2</sub> films after different dipping time.

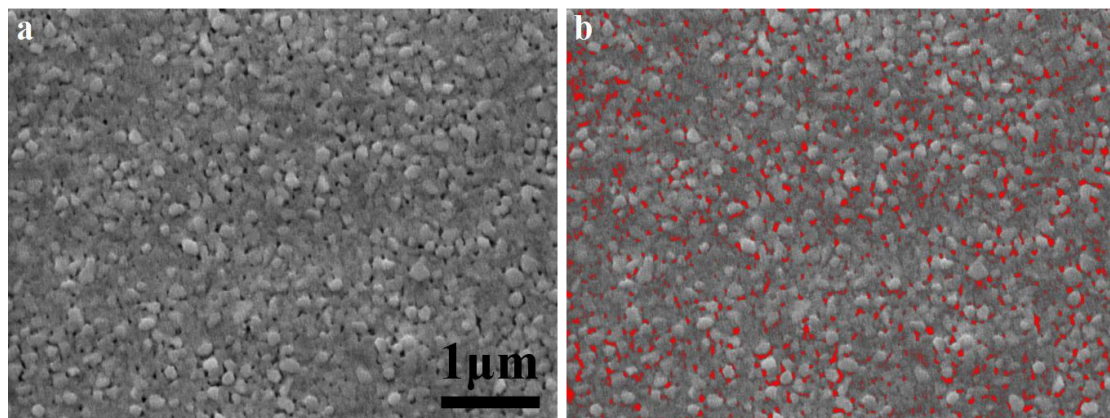

Fig. S2 (a) Surface SEM images of as-deposited PbI<sub>2</sub> film; (b) The analysis of area fraction of voids on the same as-deposited PbI<sub>2</sub> film surfaces via the ImageJ software. The red color regions indicate the voids on PbI<sub>2</sub> films. The fraction of voids in the PbI<sub>2</sub> films was estimated approximately at 5.4%.

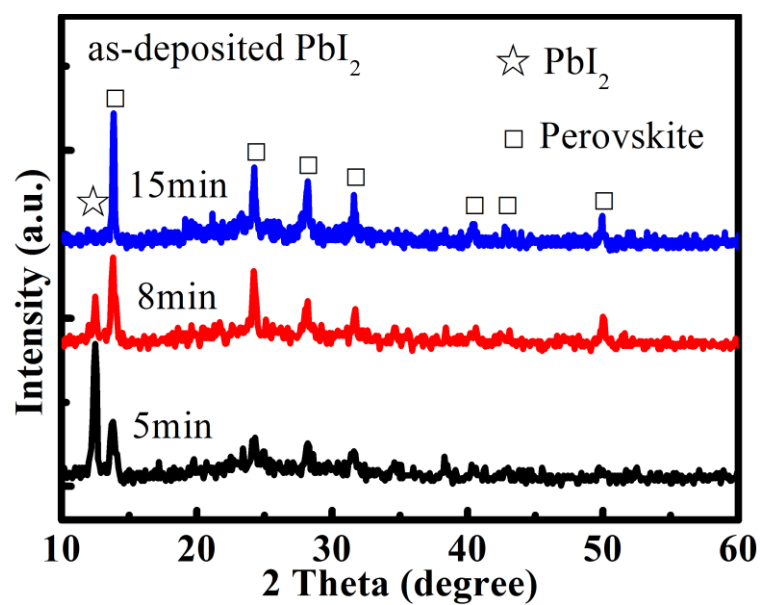

Fig. S3 The evolution of XRD patterns of the perovskite film derived from as-deposited  $\text{PbI}_2$  film on glass.

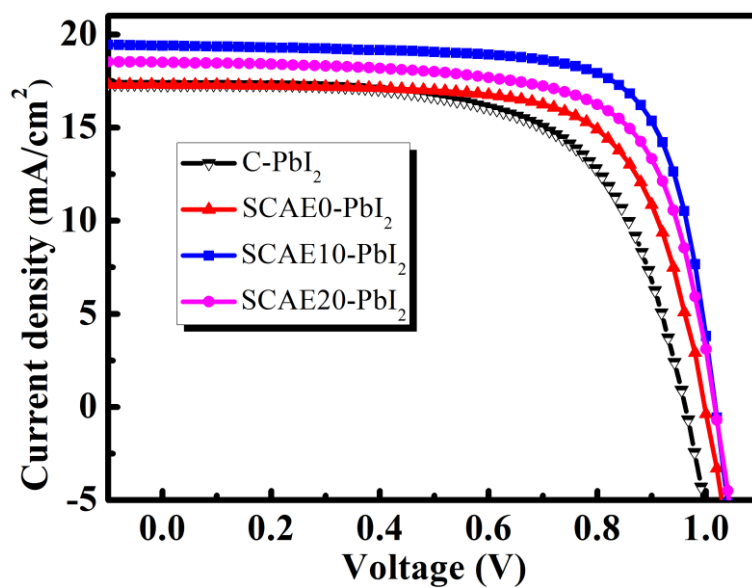

Fig. S4 The typical  $J$ - $V$  curves of bilayered mesostructured perovskite devices based on C-PVK, SCAE0-PVK, SCAE10-PVK and SCAE20-PVK films.

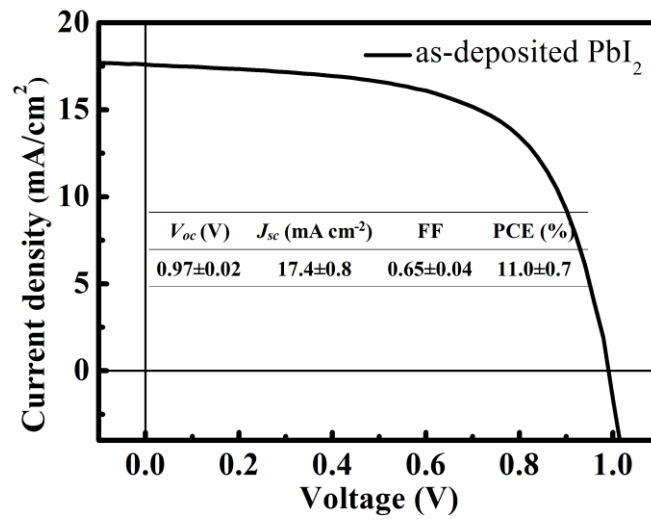

Fig. S5 Typical current density-voltage curve of the devices derived from as-deposited  $\text{PbI}_2$  measured under AM 1.5G solar irradiation of  $100 \text{ mW cm}^{-2}$  in the reverse direction. Inset is their statistic device performance results determined from six devices.

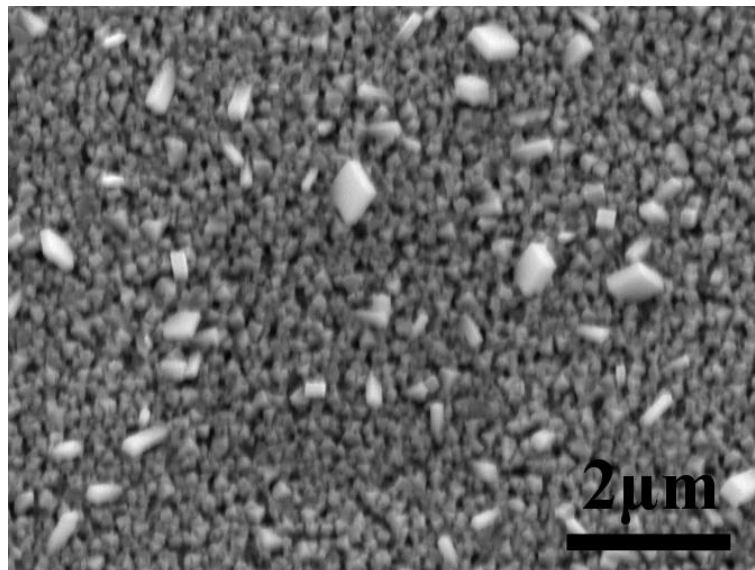

Fig. S6 Surface SEM image of the perovskite film derived from as-deposited  $\text{PbI}_2$ .
